# Supplementary material for: Risk Prediction Models for Melanoma: A Systematic Review on the Heterogeneity in Model Development and Validation
Source: PubMed Central journal article supplement (PMC7662952; doi:10.3390/ijerph17217919), 2020-10-28
Supplement: ijerph-17-07919-s001.pdf [file ijerph-17-07919-s001.pdf]

## Supplementary File 1: Complete search strategy

The search string for the literature search in Pubmed was:

```
((melanoma*[tiab] OR 'skin cancer'[tiab]) AND ('risk factor'[tiab] OR 'risk assessment'[tiab] OR 'probability'[tiab] OR 'likelihood'[tiab] OR chance[tiab] OR risk*[tiab]) AND ('prediction'[tiab] OR 'model'[tiab] OR 'score'[tiab] OR predict*[tiab])) AND (("2013/05/01"[Date - Publication] : "3000"[Date - Publication]))
```

**Supplementary Table S1.** Classification of model variables into meaningful groups

| Original variables                                       | References                | New variable(s) used for analysis |
|----------------------------------------------------------|---------------------------|-----------------------------------|
| Skin color                                               | [16,22,23,29,34,35,54,56] |                                   |
| Melanin density                                          | [19]                      | Skin color                        |
| Colorimetric variables                                   | [17]                      |                                   |
| Freckles in childhood                                    | [16,45]                   |                                   |
| Freckling                                                | [22,51,56]                |                                   |
| Freckles                                                 | [23,31]                   |                                   |
| Freckle density                                          | [32,37]                   | Freckles                          |
| Freckling tendency                                       | [30]                      |                                   |
| Density of freckles on arms before age 20                | [36]                      |                                   |
| Freckling as an adult                                    | [62]                      |                                   |
| Sunburns in all life                                     | [16,22,30,51,56]          |                                   |
| Sunburn                                                  | [18,34,46]                | Sunburns                          |
| Sunburns in childhood                                    | [23,36,37,45,62]          |                                   |
| Sun exposure > 240 hours/year                            | [21]                      |                                   |
| Mean time spent outdoors in summer aged 10-24            | [20]                      |                                   |
| Sunbathing vacations                                     | [33]                      |                                   |
| Intermittent sun exposure                                | [57]                      | Sun exposure                      |
| Vacational sun exposure                                  | [62]                      |                                   |
| Total childhood sun exposure hours                       | [45]                      |                                   |
| Outdoor UV                                               | [39]                      |                                   |
| Nevi                                                     | [18,28,33,37,45,50,62]    |                                   |
| Raised nevi                                              | [20]                      |                                   |
| Melanocytic nevi                                         | [21,35]                   |                                   |
| Moles                                                    | [22,61]                   |                                   |
| Common nevi                                              | [23,31,46,53,57,60]       |                                   |
| Melanocytic common nevi                                  | [24,25]                   | Nevi                              |
| Benign nevi                                              | [30]                      |                                   |
| Nevi density                                             | [32,49,56]                |                                   |
| Raised moles                                             | [36]                      |                                   |
| Nevi distribution                                        | [51]                      |                                   |
| Moles at age 21                                          | [52]                      |                                   |
| Keratinocytic cancer                                     | [50]                      |                                   |
| Past history of excisions for skin cancer (not melanoma) | [52]                      | Non-melanoma skin cancer          |
| Personal history of non-melanoma skin cancer             | [20,31,36,45,62]          |                                   |
| Actinic lentigines                                       | [24,25]                   |                                   |
| Solar lentigines                                         | [45,50]                   | Sun damage                        |
| Solar skin damage                                        | [22,57]                   |                                   |
| UV damage                                                | [28]                      |                                   |

| Original variables                     | References             | New variable(s) used for analysis |
|----------------------------------------|------------------------|-----------------------------------|
| Atypical nevi                          | [21,24,25,30,31,53]    | Atypical nevi                     |
| Dysplastic nevi                        | [29,57]                |                                   |
| Tanning ability                        | [22,29,34,45,52,54,59] | Tanning ability                   |
| Skin reaction to repeated sun exposure | [32]                   | Skin checks                       |
| Regular dermatologist visits           | [26]                   |                                   |
| Skin checks in the past 3 years        | [52]                   |                                   |
| Indoor tanning                         | [56]                   | Sunbed sessions                   |
| Sunbed use                             | [33,57]                |                                   |
| Sunbank sessions                       | [45,49,62]             |                                   |
| Indoor UV                              | [39]                   |                                   |
| Place of residence                     | [37]                   | Residence                         |
| Country                                | [60]                   |                                   |
| Life in a country at low latitude      | [35]                   |                                   |
| Red hair (RH)-phenotype                | [46]                   | Hair color                        |
|                                        |                        | Freckles                          |
|                                        |                        | Fitzpatrick                       |
| Pigmentation score                     | [45]                   | Tanning ability                   |
|                                        |                        | Fitzpatrick,                      |
|                                        |                        | Skin color                        |
|                                        |                        | Eye color                         |
|                                        |                        | Hair color                        |
|                                        |                        | Freckles                          |

Frequencies of risk factor combinations in risk prediction models

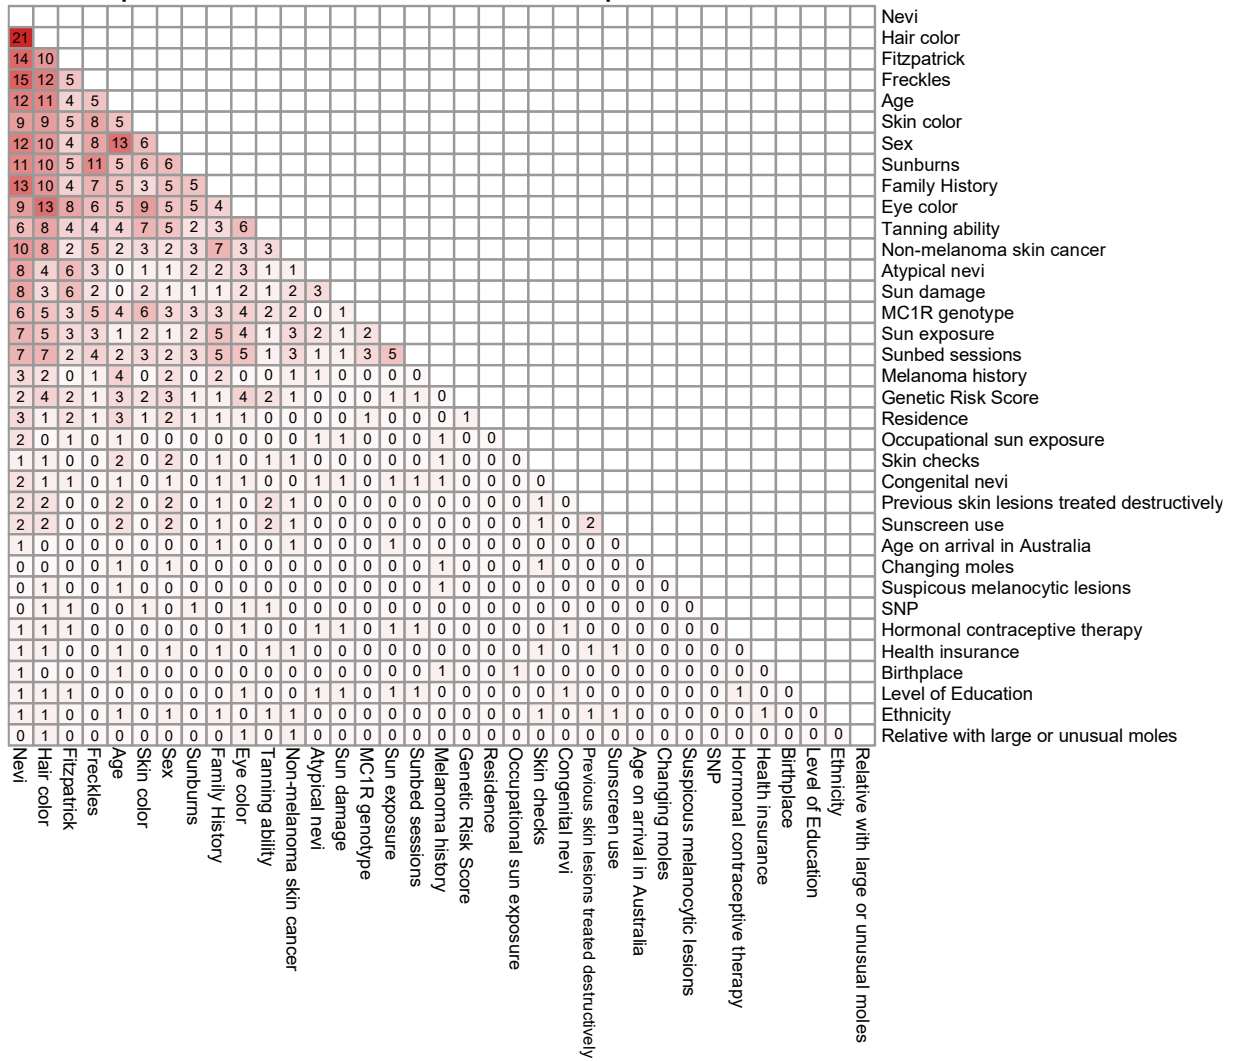

Supplementary Figure S1. Heatmap indicating relations joint occurrences of risk factor pairs among in risk prediction models for melanoma. All 35 risk factors occurring in any of the risk prediction models are included. Each number represents the absolute frequency of the corresponding risk factor combination (N = 45 models). MC1R = melanocortin 1 receptor, SNP = Single Nucleotide Polymorphism

**Supplementary Table S2.** Absolute (n) and relative (%) frequencies of methods used when evaluating risk prediction models for melanoma regarding the methodological type of validation and the type of measures describing model performance (N=40 studies). With references (ref.).

| Validation                               | Studies published up to 2011 (n=20) |      |                              | Studies published after 2011 (n=20) |       |                                 | All Studies (N=40) |      |                                                |
|------------------------------------------|-------------------------------------|------|------------------------------|-------------------------------------|-------|---------------------------------|--------------------|------|------------------------------------------------|
|                                          | n                                   | %    | ref.                         | n                                   | %     | ref.                            | n                  | %    | ref.                                           |
| Internal validation                      | 5                                   | 25.0 | [17,18,20,36,37]             | 13                                  | 65.0  | [27,34,45,49,50,52,54-57,60-62] | 18                 | 45.0 | [17,18,20,27,34,36,37,45,49,50,52,54-57,60-62] |
| Cross-validation                         | 1                                   | 5.0  | [17]                         | 5                                   | 25.0  | [34,54,57,60,62]                | 6                  | 15.0 | [17,34,54,57,60,62]                            |
| Split sample                             | 3                                   | 15.0 | [18,20,36]                   | 3                                   | 15.0  | [52,55,56]                      | 6                  | 15.0 | [18,20,36,52,55,56]                            |
| Bootstrapping                            | 1                                   | 5.0  | [37]                         | 5                                   | 25.0  | [27,45,49,50,61]                | 6                  | 15.0 | [27,37,45,49,50,61]                            |
| External validation                      | 1                                   | 5.0  | [23]                         | 5                                   | 25.0  | [49-51,59,62]                   | 6                  | 15.0 | [23,49,50,51,59,62]                            |
| Both internal and external validation    | 0                                   | 0.0  |                              | 3                                   | 15.0  | [49,50,62]                      | 3                  | 7.5  | [49,50,62]                                     |
| Neither internal nor external validation | 1<br>4                              | 70.0 | [19,21,22,24-26,28-33,35,40] | 5                                   | 25.0  | [16,39,46,53,58]                | 19                 | 47.5 | [16,19,21,22,24-26,28-33,35,39,40,46,53,58]    |
| Performance measures                     | n                                   | %    | ref.                         | n                                   | %     | ref.                            | n                  | %    | ref.                                           |
| Calibration <sup>1)</sup>                | 2                                   | 10.0 | [18,37]                      | 9                                   | 45.0  | [45,49,50,52-54,56,57,61,62]    | 11                 | 27.5 | [18,37,45,49,50,52-54,56,57,61,62]             |
| Hosmer-Lemeshow test                     | 2                                   | 10.0 | [18,37]                      | 7                                   | 35.0  | [45,50,54,56,57,61,62]          | 9                  | 22.5 | [18,37,45,50,54,56,57,61,62]                   |
| Graph (plot/intercept/slope)             | 0                                   | 0.0  |                              | 3                                   | 15.0  | [49,52,61]                      | 3                  | 7.5  | [49,52,61]                                     |
| Calibration in the large                 | 0                                   | 0.0  |                              | 1                                   | 5.0   | [49]                            | 1                  | 2.5  | [49]                                           |
| Discrimination <sup>2)</sup>             | 9                                   | 45.0 | [17-20,23,28,35-37]          | 20                                  | 100.0 | [16,27,34,39,45,46,49,50-62]    | 29                 | 72.5 | [16-20,23,27,28,34-37,39,45,46,49,50-62]       |
| AUC                                      | 8                                   | 40.0 | [17-19,23,28,35-37]          | 18                                  | 90.0  | [16,27,34,39,45,46,49-51,54-62] | 26                 | 65.0 | [16-19,23,27,28,34-37,39,45,46,49,50,51,54-62] |
| C-index                                  | 0                                   | 0.0  |                              | 3                                   | 15.0  | [52,53,58]                      | 3                  | 7.5  | [52,53,58]                                     |
| Discrimination slope                     | 0                                   | 0.0  |                              | 1                                   | 5.0   | [45]                            | 1                  | 2.5  | [45]                                           |
| ROC plot (without AUC calculation)       | 1                                   | 5.0  | [20]                         | 0                                   | 0.0   |                                 | 1                  | 2.5  | [20]                                           |
| Overall model performance <sup>3)</sup>  | 0                                   | 0.0  |                              | 1                                   | 5.0   | [45]                            | 1                  | 2.5  | [45]                                           |
| Brier score                              | 0                                   | 0    |                              | 1                                   | 5.0   | [45]                            | 1                  | 2.5  | [45]                                           |
| Nagelkerk's R <sup>2</sup>               | 0                                   | 0    |                              | 1                                   | 5.0   | [45]                            | 1                  | 2.5  | [45]                                           |

| Performance measures             | Studies published up to 2011<br>(n=20) |      |                           | Studies published after 2011<br>(n=20) |      |                           | All Studies (N=40) |      |                                    |
|----------------------------------|----------------------------------------|------|---------------------------|----------------------------------------|------|---------------------------|--------------------|------|------------------------------------|
|                                  | n                                      | %    | Ref.                      | n                                      | %    | Ref.                      | n                  | %    | Ref.                               |
| Reclassification <sup>4)</sup>   | 0                                      | 0.0  |                           | 4                                      | 20.0 | [45,46,59,62]             | 4                  | 10.0 | [45,46,59,62]                      |
| Net reclassification improvement | 0                                      | 0.0  |                           | 4                                      | 20.0 | [45,46,59,62]             | 4                  | 10.0 | [45,46,59,62]                      |
| Integrated discrimination index  | 0                                      | 0.0  |                           | 2                                      | 10.0 | [45,59]                   | 2                  | 5.0  | [45,59]                            |
| Clinically usefulness            | 3                                      | 15.0 | [17,18,36]                | 8                                      | 40.0 | [27,45,61,57,49,52,55,46] | 11                 | 27.5 | [17,18,27,36,45,46,49,52,55,57,61] |
| Sensitivity/specificity          | 3                                      | 15.0 | [17,18,36]                | 5                                      | 25.0 | [27,45,55,57,61]          | 8                  | 20.0 | [17,18,27,36,45,55,57,61]          |
| Decision curve                   | 0                                      | 0.0  |                           | 3                                      | 15.0 | [49,52,46]                | 3                  | 7.5  | [49,52,46]                         |
| No performance measure at all    | 11                                     | 55.0 | [21,24-26,29,30-33,35,40] | 0                                      | 0.0  |                           | 11                 | 27.5 | [21,24-26,29,30-33,35,40]          |

<sup>1)</sup> Two studies reported multiple calibration measures; <sup>2)</sup> Two studies reported multiple discrimination measures; <sup>3)</sup> One study reported both performance measures; <sup>4)</sup> Two studies reported both reclassification measures
